# Supplementary material
Source: Springer Nature journal article supplement (https://www.springermedizin.de/resource/supplementary/12914_2011_184_MOESM2_ESM.pdf/9536912)

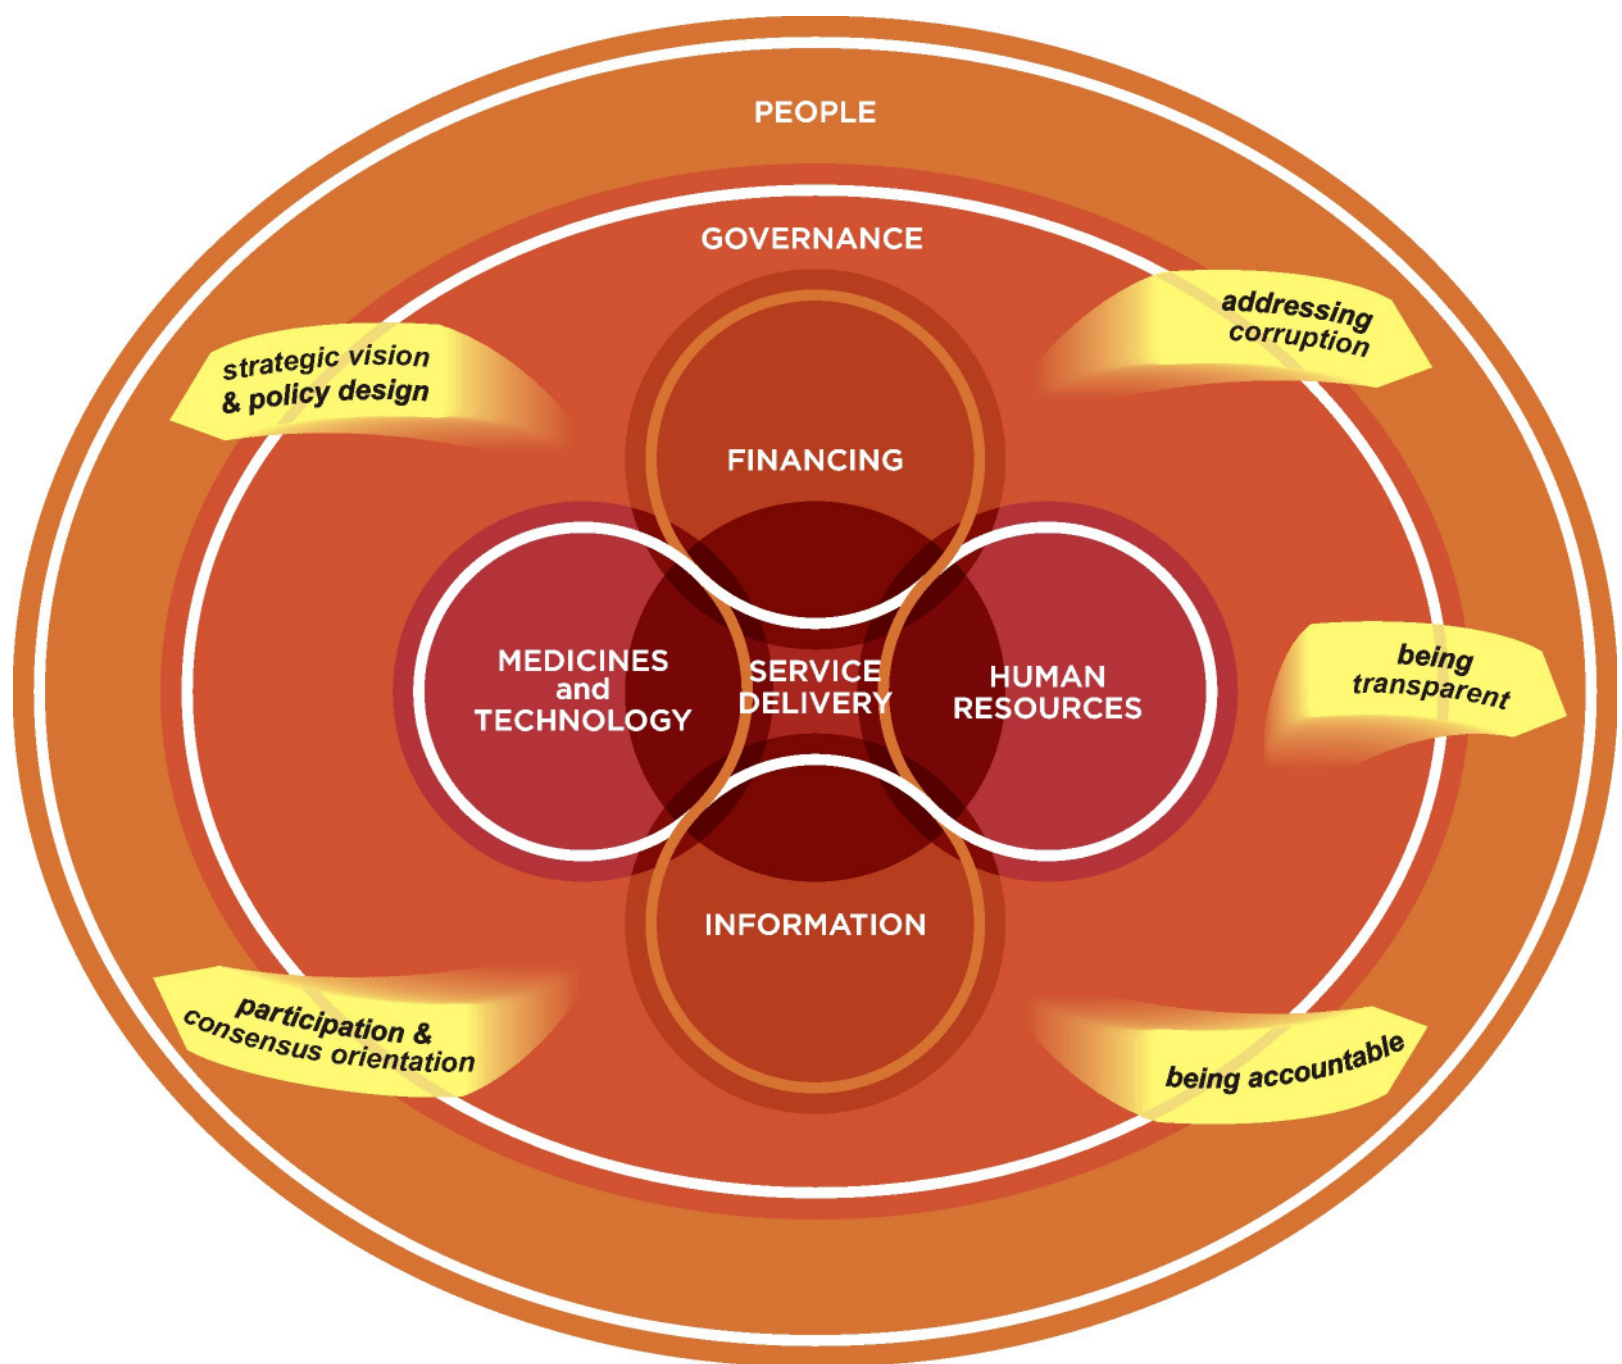

Supplement: MOESM2 [file 9536912]
